# Supplementary material for: Functional Dependency in Mexico: Measurement Issues and Policy Challenges
Source: PubMed Central journal article supplement (PMC9808163; doi:10.34172/ijhpm.2020.248), 2020-12-19
Supplement: ijhpm-11-1017-s001.pdf [file ijhpm-11-1017-s001.pdf]

**Supplementary file 1.** Summary of Methodological Decisions taken to calculate dependency using the ENASEM

| Reference                                      | Activities Used                                                                                                                                                                                                                                                     | Criteria to Define FD                                                                     | Reported Result                                                                                                                                                                                    |
|------------------------------------------------|---------------------------------------------------------------------------------------------------------------------------------------------------------------------------------------------------------------------------------------------------------------------|-------------------------------------------------------------------------------------------|----------------------------------------------------------------------------------------------------------------------------------------------------------------------------------------------------|
| [13]<br>Aguilar-Navarro et al. (2015)          | BADL (5): Katz index (bathing, walking, moving from bed to chair, continence, eating)<br>IALD (4): Lawton and Brody scale (taking medicines, managing money, shopping, grooming)                                                                                    | Declares difficulty in at least one activity                                              | Prevalence<br>BADL: 3%<br>IADL: 10.1%                                                                                                                                                              |
| [3]<br>Aranco et al. (2018)                    | BADL (5): bathing, toileting, eat/drink, dressing, changing positions/ getting in and out of the bed                                                                                                                                                                | Declares difficulty in at least one activity                                              | Prevalence for type of activity<br>People with FD: 2,417,000                                                                                                                                       |
| [19]<br>Díaz de León<br>González et al. (2012) | BADL (6): bathing, dressing, toileting, eating, continence<br>IALD (4): preparing meals, shopping, taking medicines, managing money                                                                                                                                 | Sum of BADL and IADL that require help                                                    | Report incidence instead of prevalence                                                                                                                                                             |
| [20]<br>Díaz-Venegas C et al. (2015)           | BADL (5): Katz index (bathing, dressing, eating, toileting, moving in and out of bed)                                                                                                                                                                               | Declare need for help of not being able to perform at least one activity                  | Number of BADL limitations:<br>0: 72.8<br>1-2: 20.4<br>3+: 6.8                                                                                                                                     |
| [21]<br>Dorantes-Mendoza et al. (2007)         | BADL (5) Katz index (bathing, dressing, toileting, moving inside the house, eating)<br>Continence was analyzed as a binary variable, independently from the other BADL.<br>IALD (4): Lawton and Brody (preparing meals, taking medicines, shopping, managing money) | Declares difficulty and need for help in for performing at least one of these activities. | Prevalence<br>BADL dependents: 7.3%<br>IADL dependents: 8.4%                                                                                                                                       |
| [34]<br>Mejía-Arango and Gutierrez (2011)      | BADL (5): walking, bathing, eating, going to bed, toileting<br>IALD (4): preparing a hot meal, shopping, taking medicines, managing money                                                                                                                           | People that requires help in at least one or more BADL and/or two or more IADL            | Reports prevalence jointly with cognitive impairment and FD (3.3%)                                                                                                                                 |
| [36]<br>Montes de Oca and Hebrero (2008)       | BADL (5): walking, bathing, eating, going to bed, toileting<br>IALD (4): preparing a hot meal, shopping, taking medicines, managing money                                                                                                                           | Declares difficulty in at least one activity                                              | Prevalence<br>BADL limitation: 15%<br>IADL limitation: 13%<br>BADL limitation only: 7.7%<br>IADL limitation only: 6.0%<br>BADL + IADL limitation: 7.7%                                             |
| [28]<br>Trujillo et al. (2012)                 | BADL (6): bathing, dressing, toileting, walking, going in and out from chair, eating<br>IALD (6): preparing meals, shopping, managing money, using the phone, grooming (light and heavy duties)                                                                     | BADL index: scale from 0 to 5<br>IALD index: scale from 0 to 15                           | Number of people with FD<br>BADL: Men Women<br>60-70: 4,809 4,842<br>70-85: 4,659 4,571<br>85+: 3,864 3,311<br>IADL: Men Women<br>60-70: 12,037 11,001<br>70-85: 10,902 10,196<br>85+: 9,133 9,992 |
